# Supplementary material for: Stomatin-Mediated Inhibition of the Akt Signaling Axis Suppresses Tumor Growth
Source: Oxford University Press journal article supplement (doi:10.1158/0008-5472.can-20-2331), 2021-03-23
Supplement: 00085472can202331-sup-247060_2_supp_6967770_qpjdty.xlsx [file 00085472can202331-sup-247060_2_supp_6967770_qpjdty.xlsx]

## Sheet: Sheet1
Supplementary Table 1. List of the primary antibodies used in this study.
Name	Source	Type	Company	Catalogue No.	Dilution ratio (Application)
Stomatin (E-5)	Mouse	Monoclonal	Santa Cruz Biotechnology	sc-376869	1:1,000 (IB), 1:100 (ICC and IHC)
GAPDH (3H12)	Mouse	Monoclonal	Medical & Biological Laboratories	M171-3	1:1,000 (IB)
GFP (mFX75)	Mouse	Monoclonal	Wako Pure Chemical Industries	012-22541	1:1,000 (IB)
GFP (mFX73)	Mouse	Monoclonal	Wako Pure Chemical Industries	012-20461	1:100 (IP and ICC)
Ki67 (8D5)	Mouse	Monoclonal	Cell Signaling Technology	#9449	1:800 (ICC and IHC)
Phospho-Akt [Ser473] (D9E)	Rabbit	Monoclonal	Cell Signaling Technology	#4060	1:2,000 (IB), 1:400 (IHC)
Akt (C67E7)	Rabbit	Monoclonal	Cell Signaling Technology	#4691	1:1,000 (IB)
Phospho-FoxO1 [Thr24]/FoxO3a [Thr32]/FoxO4 [Thr28] (4G6)	Rabbit	Monoclonal	Cell Signaling Technology	#2599	1:1,000 (IB)
FoxO3a (75D8)	Rabbit	Monoclonal	Cell Signaling Technology	#2497	1:1,000 (IB)
Cleaved PARP [Asp214] (D64E10)	Rabbit	Monoclonal	Cell Signaling Technology	#5625	1:1,000 (IB)
Cleaved Caspase 3 [Asp175]	Rabbit	Polyclonal	Cell Signaling Technology	#9661	1:400 (IHC)
PDK1 (D4Q4D)	Rabbit	Monoclonal	Cell Signaling Technology	#13037	1:1,000 (IB), 1:100 (IP)
PDPK1 (E-3)	Mouse	Monoclonal	Santa Cruz Biotechnology	sc-17765	1:500 (IHC)
Bcl-XL (7B2.5)	Mouse	Monoclonal	Santa Cruz Biotechnology	sc-56021	1:1,000 (IB)
Bcl-2 (100)	Mouse	Monoclonal	Santa Cruz Biotechnology	sc-509	1:1,000 (IB)
β-Actin (C4)	Mouse	Monoclonal	Santa Cruz Biotechnology	sc-47778	1:1,000 (IB)
HSP90a/b (F-8)	Mouse	Monoclonal	Santa Cruz Biotechnology	sc-13119	1:1,000 (IB), 1:100 (IP)
E-cadherin (24E10)	Rabbit	Monoclonal	Cell Signaling Technology	#3195	1:400 (IHC)
α-Smooth muscle actin (EPR5368)	Rabbit	Monoclonal	Abcam	Ab124964	1:1000 (IHC)
FLAG (M2)	Mouse	Monoclonal	Merck	F1804	1:1,000 (IB)
FLAG	Rabbit	Polyclonal	Merck	F7425	1:100 (IP)
HA	Rabbit	Polyclonal	Medical & Biological Laboratories	561	1:1,000 (IB)
Clone name is indicated in ( ).
IB; immunoblotting, IP; immunoprecipitation, ICC; immunocytochemistry, IHC; immunohistochemistry.
