# Supplementary material for: Stomatin-Mediated Inhibition of the Akt Signaling Axis Suppresses Tumor Growth
Source: Oxford University Press journal article supplement (doi:10.1158/0008-5472.can-20-2331), 2021-03-23
Supplement: 00085472can202331-sup-247060_2_supp_6967771_qpjdty.xlsx [file 00085472can202331-sup-247060_2_supp_6967771_qpjdty.xlsx]

## Sheet: Sheet1
Supplementary Table 2. Age and blood chemistry of patients in each group before operation.
	Stomatin-High				Stomatin-Low
Subjects (n)	16				16
Age (years)	67.3125	±	1.24405		66.875	±	1.76039
Total protein (g/dL)	7.0625	±	0.103632		7.34375	±	0.10164
AST (U/L)	23.9375	±	1.61108		26.3125	±	2.51615
ALT (U/L)	21.6875	±	2.35358		24.75	±	3.68838
LDH (U/L)	188	±	10.2997		187.812	±	5.10328
ALP (U/L)	195.062	±	19.0049		192.875	±	12.259
Total bilirubin (mg/dL)	0.886875	±	0.0712783		0.941875	±	0.0843515
Sodium (mmol/L)	140.75	±	0.469929		140.812	±	0.277169
Potassium (mmol/L)	4.35625	±	0.093972		4.51875	±	0.0958379
Creatinine (mg/dL)	0.795	±	0.0357071		0.8	±	0.0323007
CRP (mg/dL)	0.084375	±	0.0157578		0.111875	±	0.0177064
PSA (ng/mL)	7.44631	±	1.50809		8.51019	±	1.39972
Gleason score	7.25	±	0.266145		8	±	0.273861
All data were not statistically significant between groups.
AST: aspartate aminotransferase, ALT: alanine aminotransferase,
LDH: lactate dehydrogenase, ALP: alkaline phosphatase,
CRP: C-reactive protein, PSA: prostate-specific antigen
